# Supplementary material for: Transcriptional Responses and GCMS Analysis for the Biosynthesis of Pyrethrins and Volatile Terpenes in Tanacetum coccineum
Source: MDPI journal article supplement (doi:10.3390/ijms222313005), 2021-11-30
Supplement: s1 [file s1]

**A**

## Correlation Heatmap

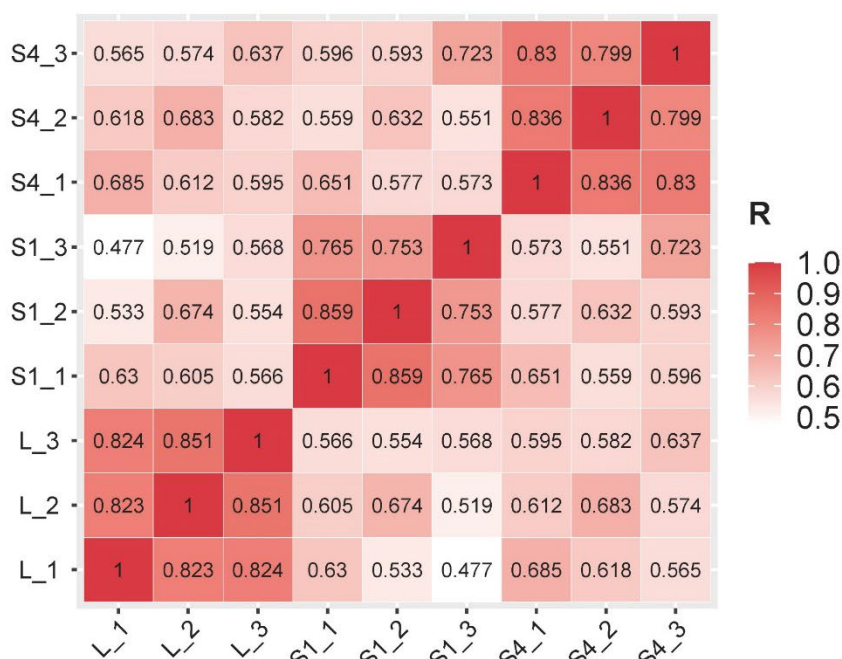

**B**

## PCA Analysis

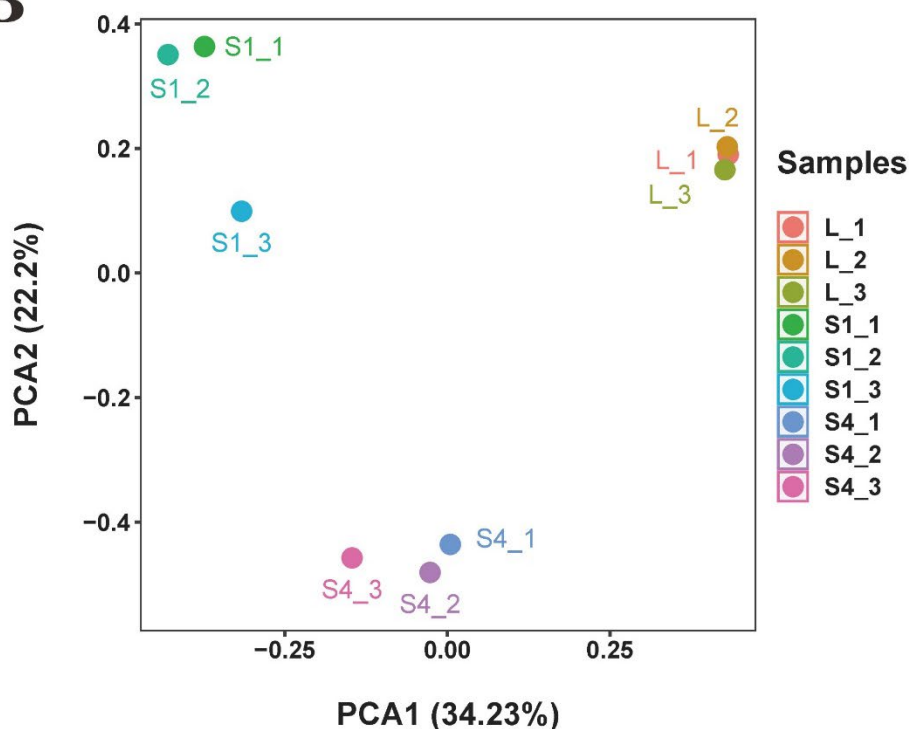

**Figure S1** Correlation and PCA analysis of samples

A: Correlation analysis of samples; B: Principal Component Analysis of samples

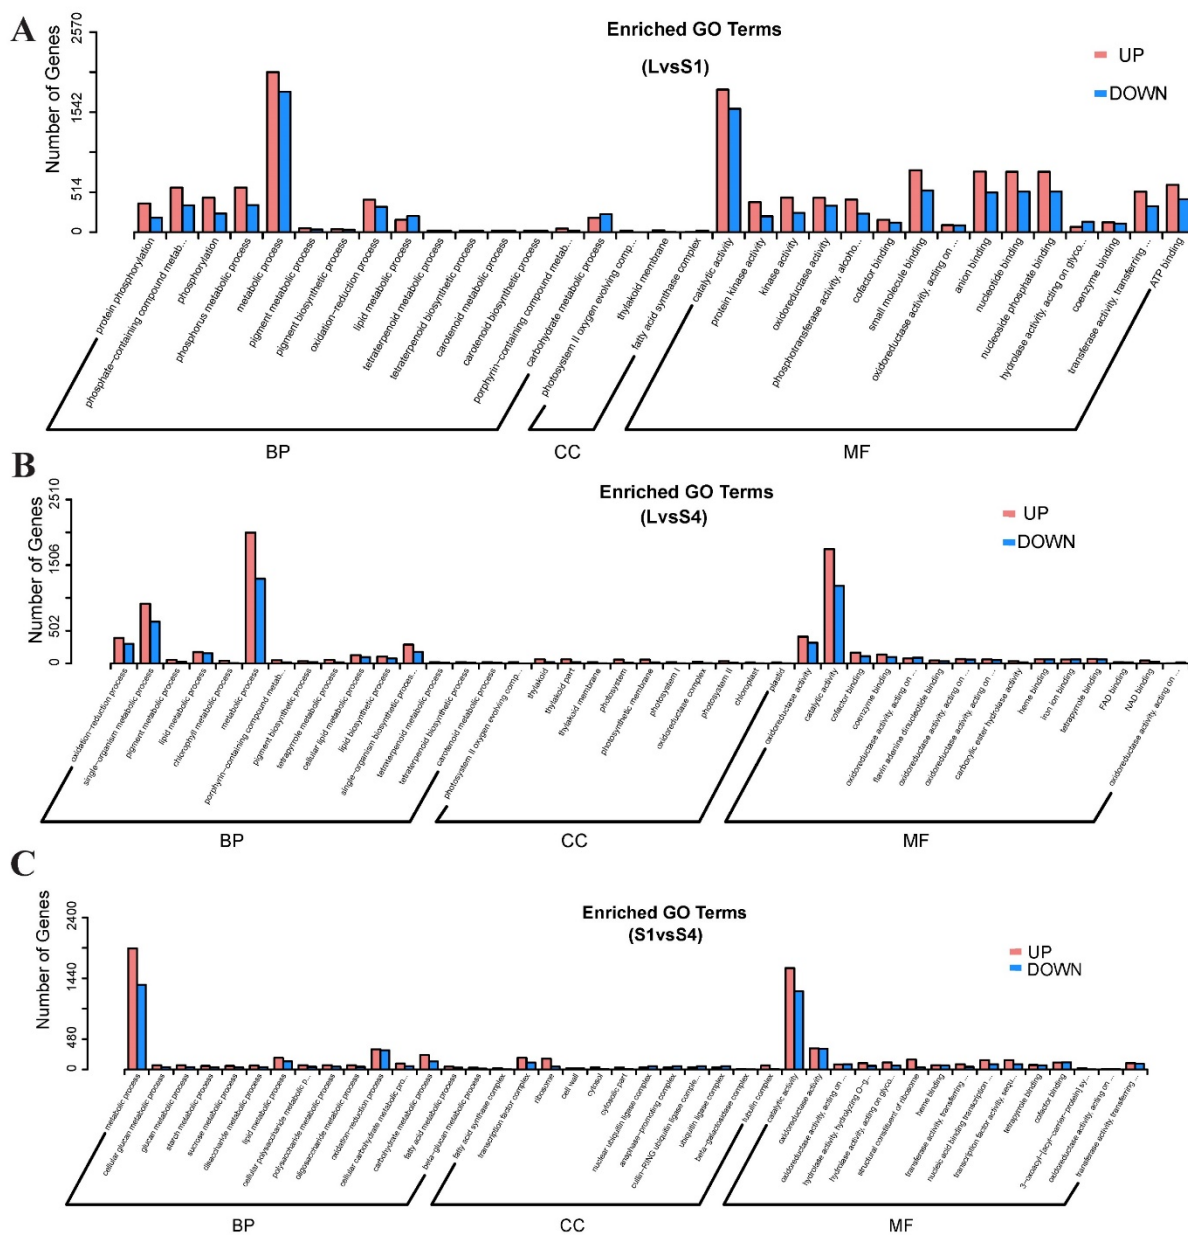

**Figure S2.** GO enrichment analysis of DEGs.

A: L vs S1; B: L vs S4; C: S1 vs S4

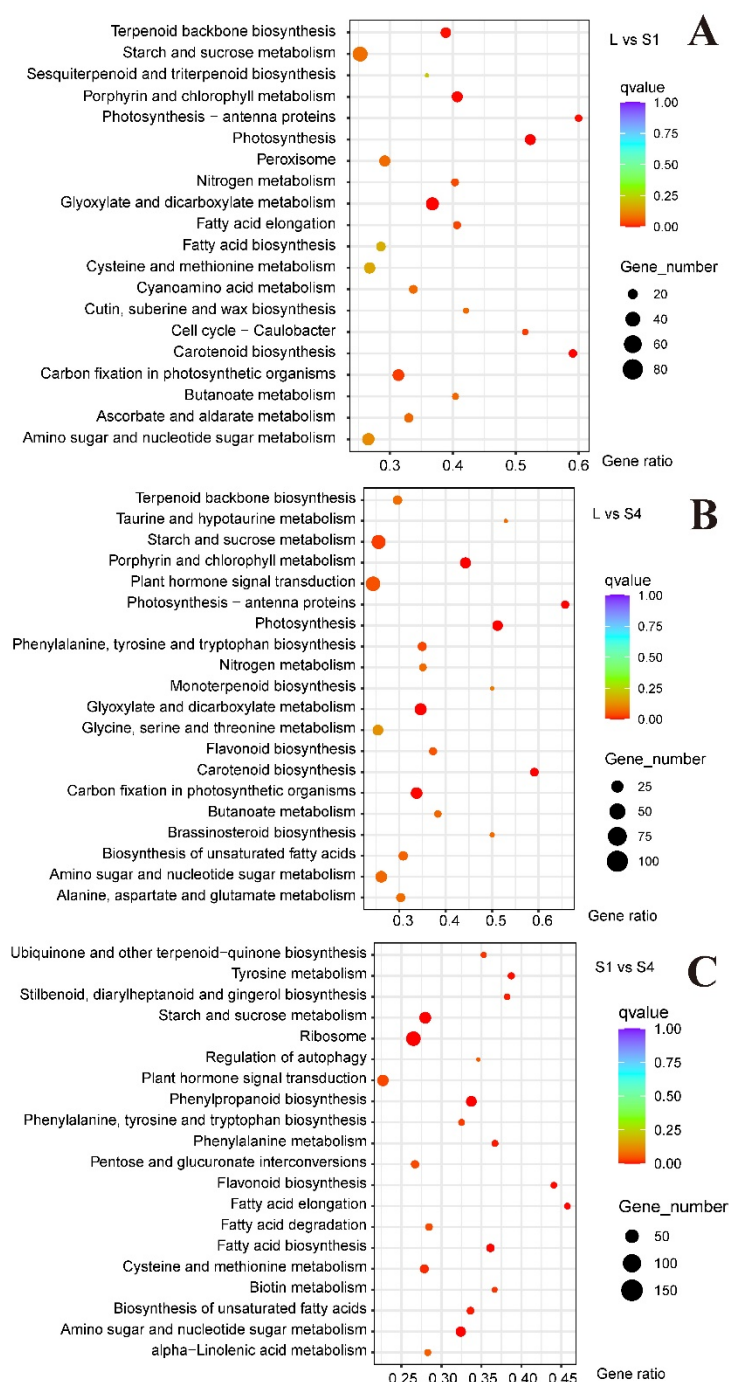

**Figure S3** KEGG enrichment analysis of DEGs.

A: L vs S1; B: L vs S4; C: S1 vs S4.

## Elixene

C<sub>15</sub>H<sub>24</sub> 204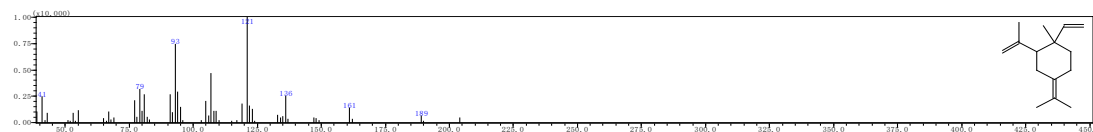

## beta.-copaene

C<sub>15</sub>H<sub>24</sub> 204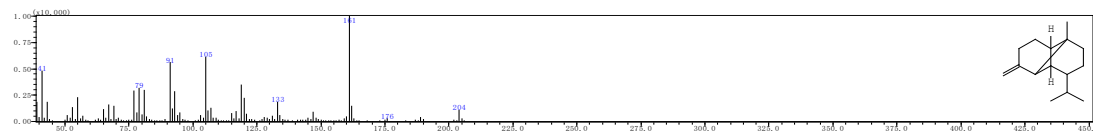

## beta.-Caryophyllen

C<sub>15</sub>H<sub>24</sub> 204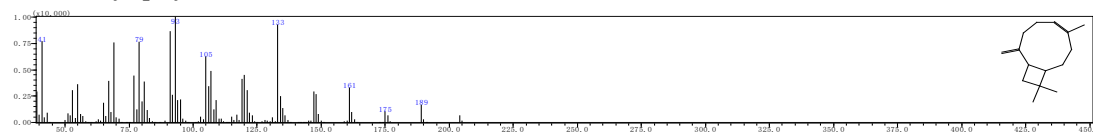

## (E)-.beta.-Farnesene

C<sub>15</sub>H<sub>24</sub> 204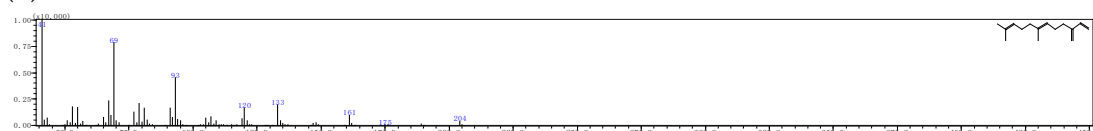

## alpha.-Bergamotene

C<sub>15</sub>H<sub>24</sub> 204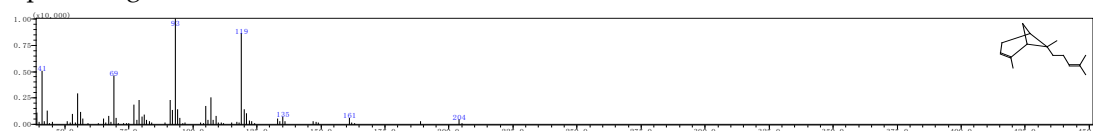

## Germacrene D

C<sub>15</sub>H<sub>24</sub> 204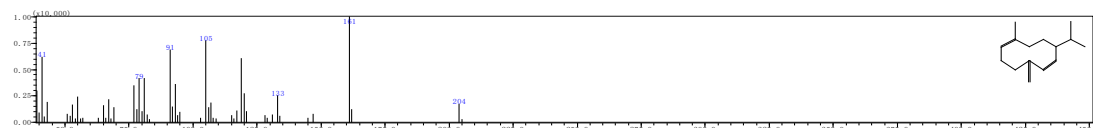

## alpha.-Farnesene

C<sub>15</sub>H<sub>24</sub> 204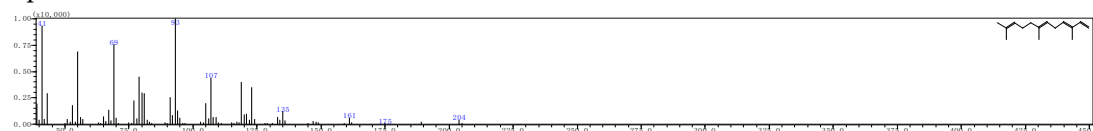

Figure S4 The mass spectrograms of pyrethrins

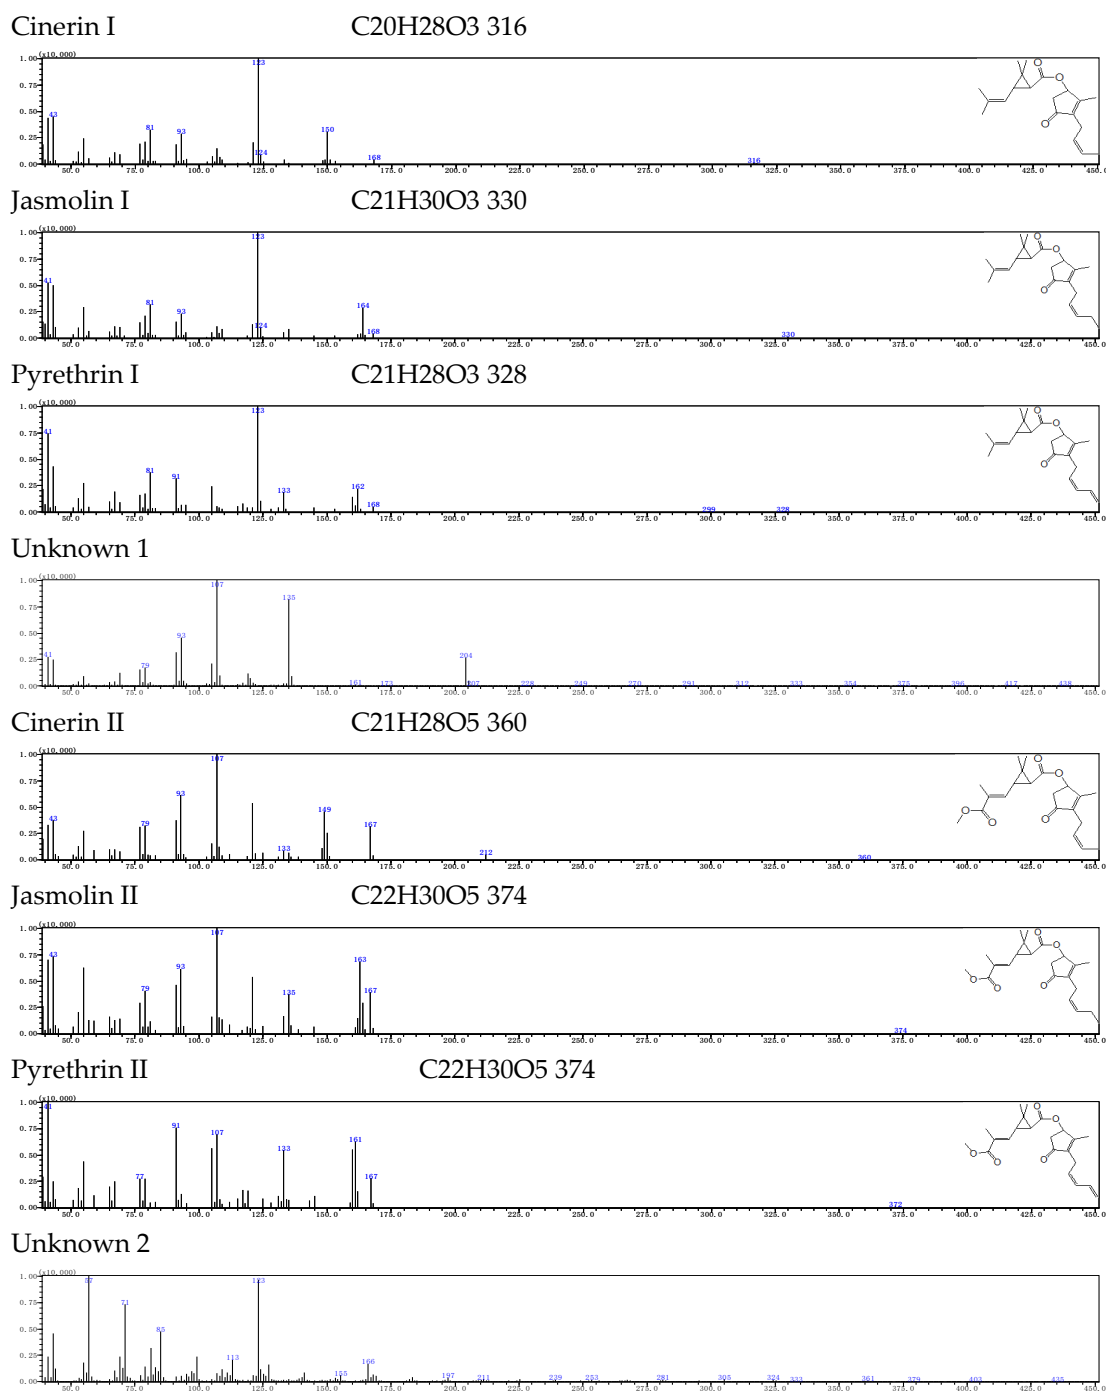**Figure S5** The mass spectrograms of volatile terpenes

**Table S1.** Summary of Illumina HiSeq™ 4000 sequencing data

| Sample | Raw reads | Clean reads      | Clean bases(bp) | Error(%) | Q20(%) | Q30(%) | GC content(%) |
|--------|-----------|------------------|-----------------|----------|--------|--------|---------------|
| L_1    | 51087630  | 48713978(95.35%) | 7.31G           | 0.03     | 97.95  | 93.77  | 43.05         |
| L_2    | 44783836  | 43123200(96.29%) | 6.47G           | 0.03     | 97.88  | 93.59  | 43.38         |
| L_3    | 45877880  | 43562156(94.95%) | 6.53G           | 0.03     | 97.68  | 93.15  | 43.13         |
| S1_1   | 47513258  | 45032560(94.78%) | 6.75G           | 0.03     | 97.76  | 93.31  | 42.31         |
| S1_2   | 46556522  | 45149940(96.98%) | 6.77G           | 0.03     | 97.91  | 93.65  | 42.29         |
| S1_3   | 43845892  | 42370462(96.63%) | 6.36G           | 0.03     | 97.72  | 93.23  | 42.09         |
| S4_1   | 45180438  | 44016074(97.42%) | 6.6G            | 0.03     | 97.84  | 93.51  | 42.37         |
| S4_2   | 43971966  | 42554940(96.78%) | 6.38G           | 0.03     | 97.88  | 93.54  | 42.37         |
| S4_3   | 46138630  | 43929062(95.21%) | 6.59G           | 0.03     | 97.97  | 93.75  | 41.99         |

Q20: Percentage of bases that account for more than 20 of Phred values. Phred= $-10\log_{10}(e)$ .

Q30: Percentage of bases that account for more than 30 of Phred values. Phred= $-10\log_{10}(e)$ .

GC content: The sum of base G and C accounts for the percentage of total base number.

**Table S2.** qRT-PCR primer

| Primer     | Primer sequence (5'to3')   |
|------------|----------------------------|
| DFR_RT_F   | ATGCCACCATTTCATCAATTAGC    |
| DFR_RT_R   | CCTCCGAACATCTCCTCCAA       |
| CHS_RT_F   | GGCTGATTACCAACTCACCAA      |
| CHS_RT_R   | TCGTTAGGACCACGGAATGT       |
| ANS_RT_F   | TCCAACCTTCTACGACAACCA      |
| ANS_RT_R   | TCCTAACCTTCTCCTTATTCACAAG  |
| GLIP_RT_F  | CGATGAACTTACTAGACTACACAA   |
| GLIP_RT_R  | AAGGACCACTACCGCAACAT       |
| ADH_RT_F   | GGTGAATGTGGACAATGCT        |
| ADH_RT_R   | CGGACCATGTGGAGCAACT        |
| CDS_RT_F   | TTCTCCTCTCACTACGACATTGA    |
| CDS_RT_R   | ACAGAATAGCCTCGGACCATC      |
| JMH_RT_F   | TTTGTTGCGGATCTTTGGC        |
| JMH_RT_R   | GTCTTCCTGATCATGAGAATTGG    |
| MT_RT_F    | TTCATTCTCAACCAGCCTACA      |
| MT_RT_R    | ACTATTTGATAGAGCGTGATT      |
| bHLH1_RT_F | TTCTGATACCACGGCTACTA       |
| bHLH1_RT_R | GCCAGACAATCCTTGATGAT       |
| CHH_RT_F   | CCACGTGTATGTAGGGAGCAATGC   |
| CHH_RT_R   | CAGGATCAGTTGAACATGCCGAAAG  |
| ALDH_RT_F  | CATTCCGCTACTTTGCTGGTGC     |
| ALDH_RT_R  | TCCAAGGAATGATGTGTCCAACCTAC |
| PYS_RT_F   | CTACAAGGTGCCCCCAAAGA       |
| PYS_RT_R   | TGATGACGGCTCCAAGGTAGA      |
